# Supplementary material for: Prospective study of retention in opioid agonist treatment and contact with emergency healthcare following release from prisons in Victoria, Australia
Source: HighWire-hosted journal article supplement (doi:10.1136/emermed-2022-212755), 2023-02-09
Supplement: emermed-2022-212755supp001_data_supplement.pdf [file emermed-2022-212755supp001_data_supplement.pdf]

**Appendix 1.** Medicare Benefits Schedule (MBS) codes used to determine count of general practitioner (GP) contacts between date of index release and three-month follow-up interview.

| <b>GP consultation type</b> | <b>MBS Item Codes</b>                          |
|-----------------------------|------------------------------------------------|
| Standard Consultation       | 3, 4, 23, 24                                   |
| Extended Consultation       | 36, 37, 44, 47                                 |
| Mental Health Consultation  | 2700, 2701, 2712, 2713, 2715, 2717, 2721, 2725 |
| After Hours Consultation    | 5000, 5020, 5023, 5028, 5040, 5043, 5060       |

**Appendix 2.** Baseline participant characteristics of a cohort of men who regularly injected drugs prior to imprisonment who were released from prison between September 2014 and May 2016 in Victoria, Australia, stratified by analysis inclusion

|                                                                               | Excluded <sup>a</sup><br>(N=135)<br>n (%) | Included<br>(N=265)<br>n (%) | p-value            |
|-------------------------------------------------------------------------------|-------------------------------------------|------------------------------|--------------------|
| Age (mean, [SD <sup>b</sup> ])                                                | 36 (9)                                    | 36 (8)                       | 0.424 <sup>c</sup> |
| Aboriginal and/or Torres Strait Islander                                      | 23 (17)                                   | 43 (16)                      | 0.836 <sup>d</sup> |
| Born in Australia                                                             | 119 (88)                                  | 239 (90)                     | 0.529 <sup>d</sup> |
| Unemployed prior to index imprisonment                                        | 122 (90)                                  | 230 (87)                     | 0.213 <sup>d</sup> |
| Completed High school                                                         | 18 (13)                                   | 52 (20)                      | 0.117 <sup>d</sup> |
| Historical psychiatric admission                                              | 36 (27)                                   | 84 (32)                      | 0.299 <sup>d</sup> |
| Self-reported fair or poor health at baseline                                 | 35 (26)                                   | 60 (23)                      | 0.465 <sup>d</sup> |
| Times moved in the 12 months before index imprisonment (n=392)                |                                           |                              |                    |
| 0                                                                             | 51 (39)                                   | 104 (40)                     |                    |
| 1–2                                                                           | 28 (21)                                   | 70 (27)                      | 0.278 <sup>d</sup> |
| 3+                                                                            | 53 (40)                                   | 85 (33)                      |                    |
| C-GHQ-12 <sup>e</sup> Score (median, [IQR <sup>f</sup> ])                     | 4 (2–7)                                   | 5 (2–7)                      | 0.692 <sup>g</sup> |
| Days IDU in the month before index imprisonment (median, [IQR <sup>f</sup> ]) | 28 (17–28)                                | 28 (9–28)                    | 0.108 <sup>g</sup> |
| Receiving OAT at baseline interview                                           | 62 (46)                                   | 103 (39)                     | 0.175 <sup>d</sup> |

<sup>a</sup> Reasons for exclusion: died before three-month follow-up (n=5), did not complete three-month follow-up (n=118), missing DJCS data (n=9), missing covariate data (n=3); <sup>b</sup> standard deviation; <sup>c</sup> independent samples t-test; <sup>d</sup> Chi-square test; <sup>e</sup> 12-Item General Health Questionnaire; <sup>f</sup> interquartile range;

<sup>g</sup> Mann-Whitney U test

**Appendix 3.** Participant characteristics, total ambulance and ED counts, and results of adjusted generalised linear models for ambulance and emergency department contacts, reported as adjusted incidence rate ratios (AIRR) among a cohort of men who regularly injected drugs prior to imprisonment who were released from prison between September 2014 and May 2016 in Victoria, Australia (N=265).

|                                                             | Participants<br>(N=265) |       | 1. Ambulance Contacts<br>(n=77) |         | 2. Emergency Department Contacts<br>(n=123) |                  |         |
|-------------------------------------------------------------|-------------------------|-------|---------------------------------|---------|---------------------------------------------|------------------|---------|
|                                                             | n (%)                   | count | AIRR (95%CI)                    | p-value | count                                       | AIRR (95%CI)     | p-value |
| Age at baseline (mean, [SD <sup>a</sup> ])                  | 36 (8)                  | -     | 1.02 (0.99–1.05)                | 0.295   | -                                           | 0.96 (0.93–0.99) | 0.016   |
| Aboriginal and/or Torres Strait Islander                    | 43 (16)                 | 7     | 0.76 (0.30–1.89)                | 0.554   | 10                                          | 0.51 (0.22–1.15) | 0.106   |
| Historical psychiatric admission                            | 84 (32)                 | 37    | 1.39 (0.74–2.58)                | 0.304   | 69                                          | 1.90 (1.15–3.14) | 0.012   |
| Post-release OAT <sup>b</sup>                               |                         |       |                                 |         |                                             |                  |         |
| None                                                        | 156 (59)                | 51    | 1.00                            |         | 81                                          | 1.00             |         |
| Interrupted                                                 | 34 (13)                 | 11    | 0.54 (0.21–1.34)                | 0.182   | 14                                          | 0.54 (0.23–1.24) | 0.144   |
| Complete                                                    | 75 (28)                 | 15    | 0.33 (0.14–0.76)                | 0.009   | 28                                          | 0.43 (0.22–0.83) | 0.012   |
| Self-reported fair or poor health <sup>c</sup>              | 123                     | 26    | 1.41 (0.71–2.77)                | 0.326   | 36                                          | 1.07 (0.58–1.94) | 0.836   |
| Times moved since index release <sup>d</sup>                |                         |       |                                 |         |                                             |                  |         |
| 0                                                           | 113 (43)                | 21    |                                 |         | 37                                          |                  |         |
| 1–2                                                         | 78 (29)                 | 22    | 1.47 (1.04–2.07)                | 0.029   | 40                                          | 1.22 (0.91–1.65) | 0.182   |
| 3+                                                          | 74 (28)                 | 34    |                                 |         | 46                                          |                  |         |
| GP <sup>e</sup> consultations (median, [IQR <sup>f</sup> ]) | 3 (1–6)                 | -     | 1.07 (1.03–1.12)                | 0.001   | -                                           | 1.06 (1.02–1.10) | 0.004   |
| C-GHQ-12 score (median, [IQR <sup>g</sup> ])                | 3 (1–6)                 | -     | 0.90 (0.81–0.99)                | 0.038   | -                                           | 0.96 (0.88–1.04) | 0.318   |
| Any IDU <sup>h</sup> since baseline interview               | 221 (83)                | 66    | 1.29 (0.57–2.90)                | 0.543   | 107                                         | 1.26 (0.63–2.54) | 0.516   |
| Constant                                                    | -                       | -     | 0.00 (0.00–0.00)                | <0.001  | -                                           | 0.01 (0.00–0.04) | <0.001  |

<sup>a</sup> Standard deviation; <sup>b</sup> opioid agonist treatment; <sup>c</sup> versus good, very good, or excellent health; <sup>d</sup> categories modelled as a continuous function; <sup>e</sup> general practitioner; <sup>f</sup> interquartile range; <sup>g</sup> injecting drug use.
